# Supplementary material
Source: PubMed Central journal article supplement (PMC10539304)
Supplement: 41416_2023_2384_MOESM1_ESM.pdf [file 41416_2023_2384_MOESM1_ESM.pdf]

## Supplementary Materials

### Method S1. Inclusion and exclusion criteria

To develop mrDEC scoring system, LARC patients were retrospectively recruited from the five centers in China, including Guangdong Provincial People's Hospital (GDPH; Guangzhou, China), Shanxi Cancer Hospital (SXCH; Taiyuan, China), the Sixth Affiliated Hospital of Sun Yat-sen University (SYSU6; Guangzhou, China), Sun Yat-sen University Cancer Center (SYSUCC; Guangzhou, China), and Yunnan Cancer Hospital (YNCH; Kunming, China), served as Cohort1 (Figure S1). For the retrospective study, the inclusion criteria were as following: (i) All patients (aged  $\geq 18$  years) were pathologically diagnosed as rectal adenocarcinoma by electronic colonoscopy with biopsy and defined as locally advanced rectal cancer (cT3-4/N0-2, or EMVI+, or any T/N1-2, and M0) by enhanced pelvic magnetic resonance imaging (MRI);[1] (ii) All patients underwent standard neoadjuvant chemoradiotherapy (nCRT) regimen, followed by standard total mesorectal excision (TME) surgery; (iii) Pathological response [pathological complete response (pCR) vs. non-pCR] was confirmed by experienced pathologists after TME surgery; (iv) High-resolution images of pretreatment MRI sequences, including axial T2-weighted imaging (T2WI), contrast enhanced T1-weighted imaging (CE-T1WI), and diffusion weighted imaging (DWI); MRI were performed within 2 weeks before the administration of nCRT; (v) No metastasis or other tumor events occurred during nCRT and operation. The exclusion criteria were as following: (i) A history of malignancy, chemoradiation therapy or surgery; (ii) Patients received nonstandard or incomplete nCRT, or had neoadjuvant chemo- or radiotherapy alone; (iii) No surgery or the pathological response evaluation of surgical specimen was unavailable; (iv) Lack of biopsy slides, or inadequate quality of WSI for analysis requirements (i.e., torn tissues, tissue folds, fade staining, or absence of tumor tissue); (v) Lack of images of pretreatment T2WI, DWI or CE-T1WI, or insufficient quality of MRI images to obtain measurements (i.e., motion artifacts).

For further validation, we performed a retrospective analysis of prospective trial. Eligible patients were prospectively recruited from the Sixth Affiliated Hospital of Sun Yat-sen University, Yunnan Cancer Hospital, Sir Run Run Shaw Hospital of Zhejiang University, and Nanfang Hospital of Southern Medical University (Fig. S1). For the prospective cohort (Cohort 2), only one inclusion criterion was added: All patients should have an Eastern Cooperative Oncology Group performance status  $\leq 1$  and adequate hematologic, liver, and renal function at recruitment.

### **Method S2. Neoadjuvant chemoradiotherapy treatment**

All LARC patients received neoadjuvant radiotherapy concurrently given 5-fluorouracil based chemotherapy orally or intravenously. Induction chemotherapy before nCRT or consolidation chemotherapy after nCRT (5-fluorouracil based regimen combined with or without oxaliplatin, specifically for non-pCR patients) were implemented at physician's discretion. The neoadjuvant radiotherapy was delivered at 25 fractions of 2 Gy (gross tumor volume, GTV) and 1.8 Gy (clinical target volume, CTV) radiation, using Intensity-Modulated Radiation Therapy (IMRT) or Volumetric Modulated Arc Therapy (VMAT) technique. A total dose of 50 Gy (GTV)/45 Gy (CTV) radiation was administered at 2.0 Gy/1.8 Gy per fraction, over a period (weekdays, day 1 to day 5) of 5 weeks. The TME surgery was performed within 6-8 weeks after the completion of nCRT, based on standard TME operation protocol. For the previous prospective trial, 4 (4%) patients were treated with local excision after evaluation by doctor.

### **Method S3. Clinical information collection**

Clinical information was obtained from the medical records of the patients. The location of rectal cancer was categorized based on the distance of the tumor from the dentate line, with 0-5 cm classified as low rectal cancer, 5-10 cm as middle rectal cancer, and greater than 10 cm as high rectal cancer.[2] The reference range for the CEA level was established as 0-5 ng/ml.[3] TNM staging was performed in accordance with the standard criteria of the 8th TNM staging system.

#### **Method S4. Pathological Treatment Response Evaluation**

The TME surgery was undertaken after 6-8 weeks after completion of radiotherapy. Evaluation of H&E-stained slides of surgical resection specimen for residual tumor was performed under a standard reporting protocol in each participating hospital. The four categories of American Association of Cancer/College of American Pathologists (AJCC/CAP) tumor regression grading (TRG) system was employed to stratify the treatment response according to the volume of residual tumor cells: TRG 0 (complete response), no remaining viable cancer cells; TRG 1 (moderate response), only small cluster or single cancer cells remaining; TRG 2 (minimal response), residual cancer remaining with predominant fibrosis; TRG 3 (poor response), extensive residual cancer with minimal or no tumor killed [1]. We retrospectively collected data of TRG category from five centers. And data of TRG category of prospective trail was defined independently by two experienced gastroenterology pathologists, who were blinded to the clinicopathological information of patients. A third expert pathologist was responsible for the final decision in case of a disagreement between the two pathologists.

1. Glynne-Jones R, Wyrwicz L, Tiret E, Brown G, Rödel C, Cervantes A, et al. Rectal cancer: ESMO Clinical Practice Guidelines for diagnosis, treatment and follow-up. *Ann Oncol.* 2017;28 suppl\_4:iv22–40.
2. Jacobs L, Meek DB, van Heukelom J, Bollen TL, Siersema PD, Smits AB, et al. Comparison of MRI and colonoscopy in determining tumor height in rectal cancer. *United European Gastroenterol J.* 2018;6:131–7.
3. Kankanala VL, Mukkamalla SKR. Carcinoembryonic Antigen. In: *StatPearls*. Treasure Island (FL): StatPearls Publishing; 2022.

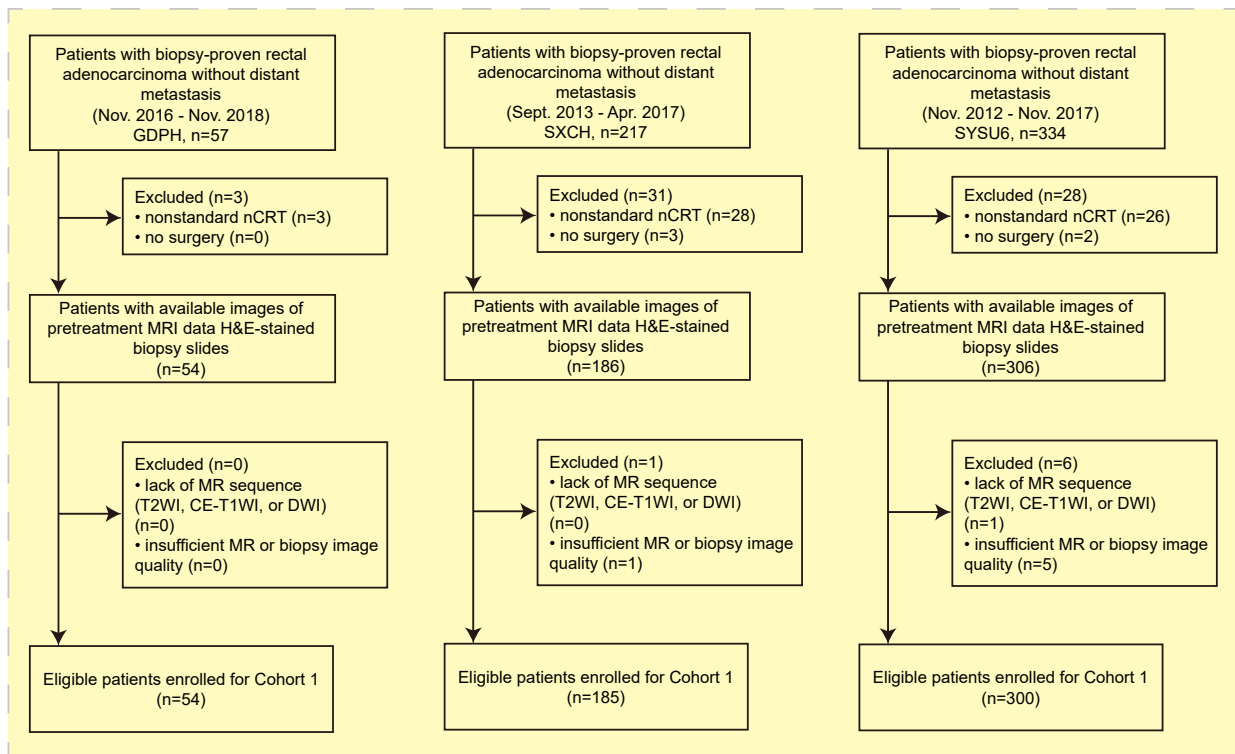

Retrospective Cohort (Cohort 1)

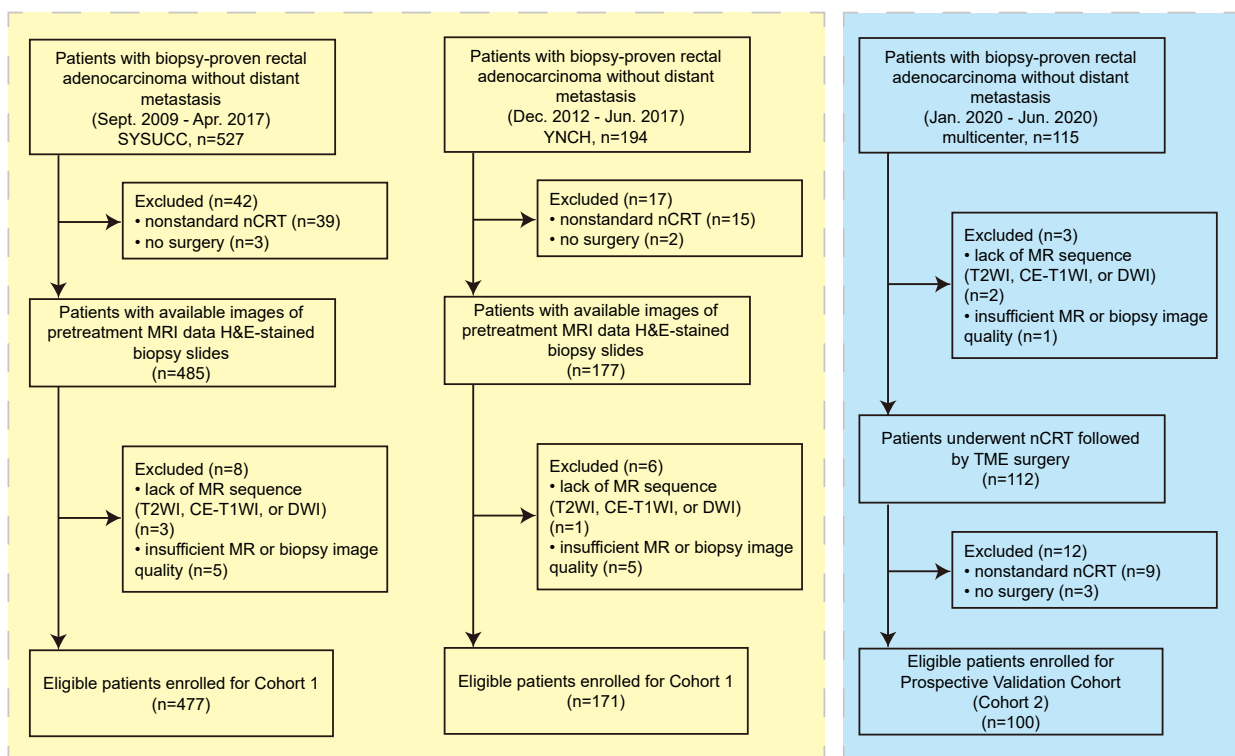

Retrospective Cohort (Cohort 1)

NCT04271657 Trial (Cohort 2)

**Figure S1. Patient enrollment for development of mrDEC scoring system.** In the retrospective cohort patients were consecutively enrolled from five independent institutions (GDPH, Guangdong Provincial People’s Hospital; SXCH, Shanxi Cancer Hospital; SYSU6, the Sixth Affiliated Hospital of Sun Yat-sen University; SYSUCC, Sun Yat-sen University Cancer Center; YNCH, Yunnan Cancer Hospital) and assigned into Cohort1. In the multicentre prospective observational clinical trial (NCT04271657), patients were prospectively recruited from four hospitals (the Sixth Affiliated Hospital of Sun Yat-sen University; Yunnan Cancer Hospital; Sir Run Run Shaw Hospital of Zhejiang University; Nanfang Hospital Southern Medical University), serving as the prospective cohort (Cohort2).

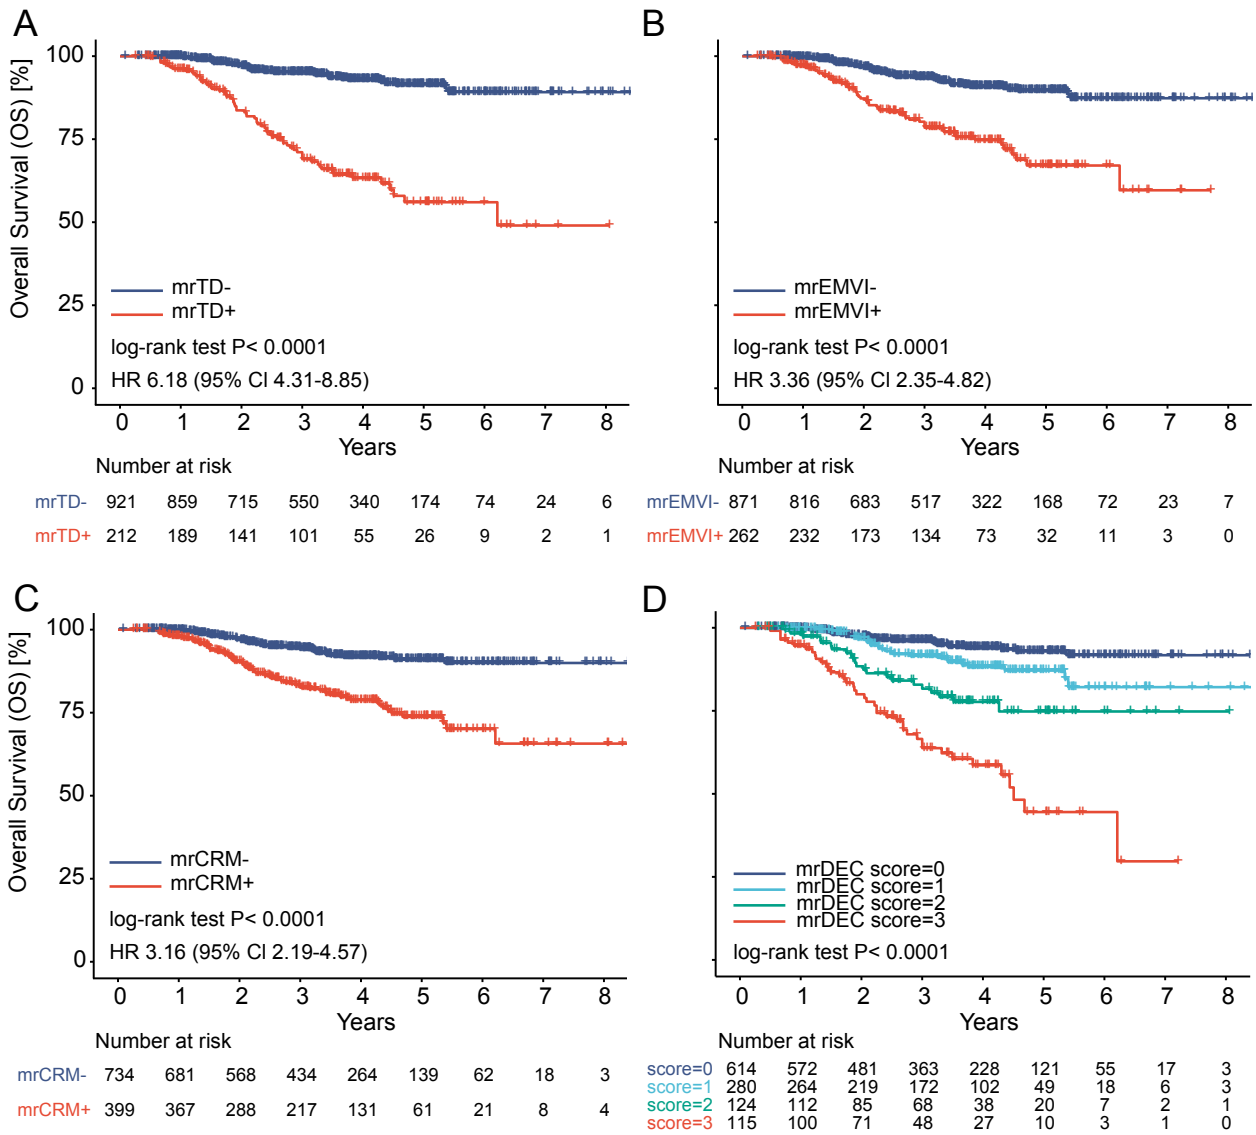

**Figure S2. Kaplan-Meier curves for overall survival (OS).** Kaplan-Meier survival curves for overall survival according to (A) mrTD status, (B) mrEMVI status, (C) mrCRM status, and (D) mrDEC score. mr, magnetic resonance; TD, tumor deposit; EMVI, extramural vascular invasion; CRM, circumferential resection margin; HR, hazard ratio.

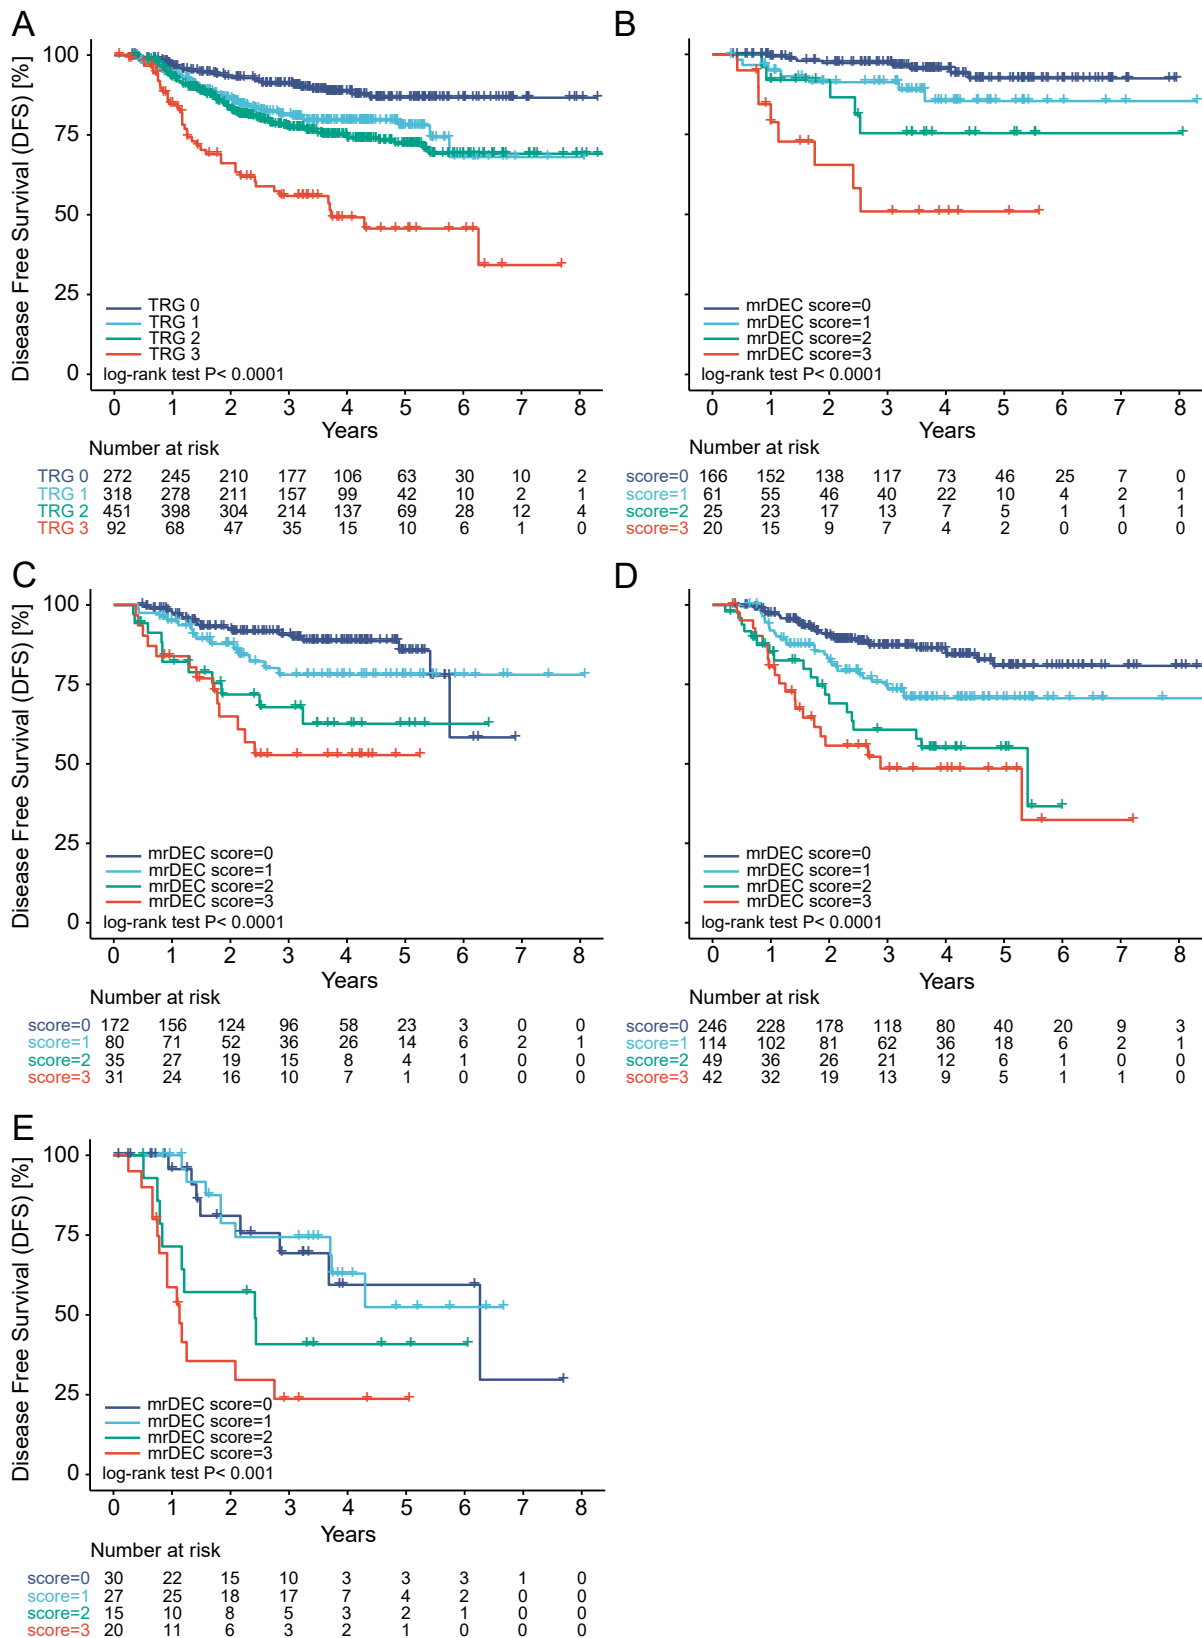

**Figure S3. Kaplan-Meier curves for disease-free survival (DFS) according to TRG and mrDEC score.** (A) Kaplan-Meier survival curves for disease-free survival according to TRG. Kaplan-Meier survival curves for disease-free survival in patients with (B) TRG 0, (C) TRG 1, (D) TRG 2, and (E) TRG 3 according to mrDEC score. TRG, tumor regression grade.

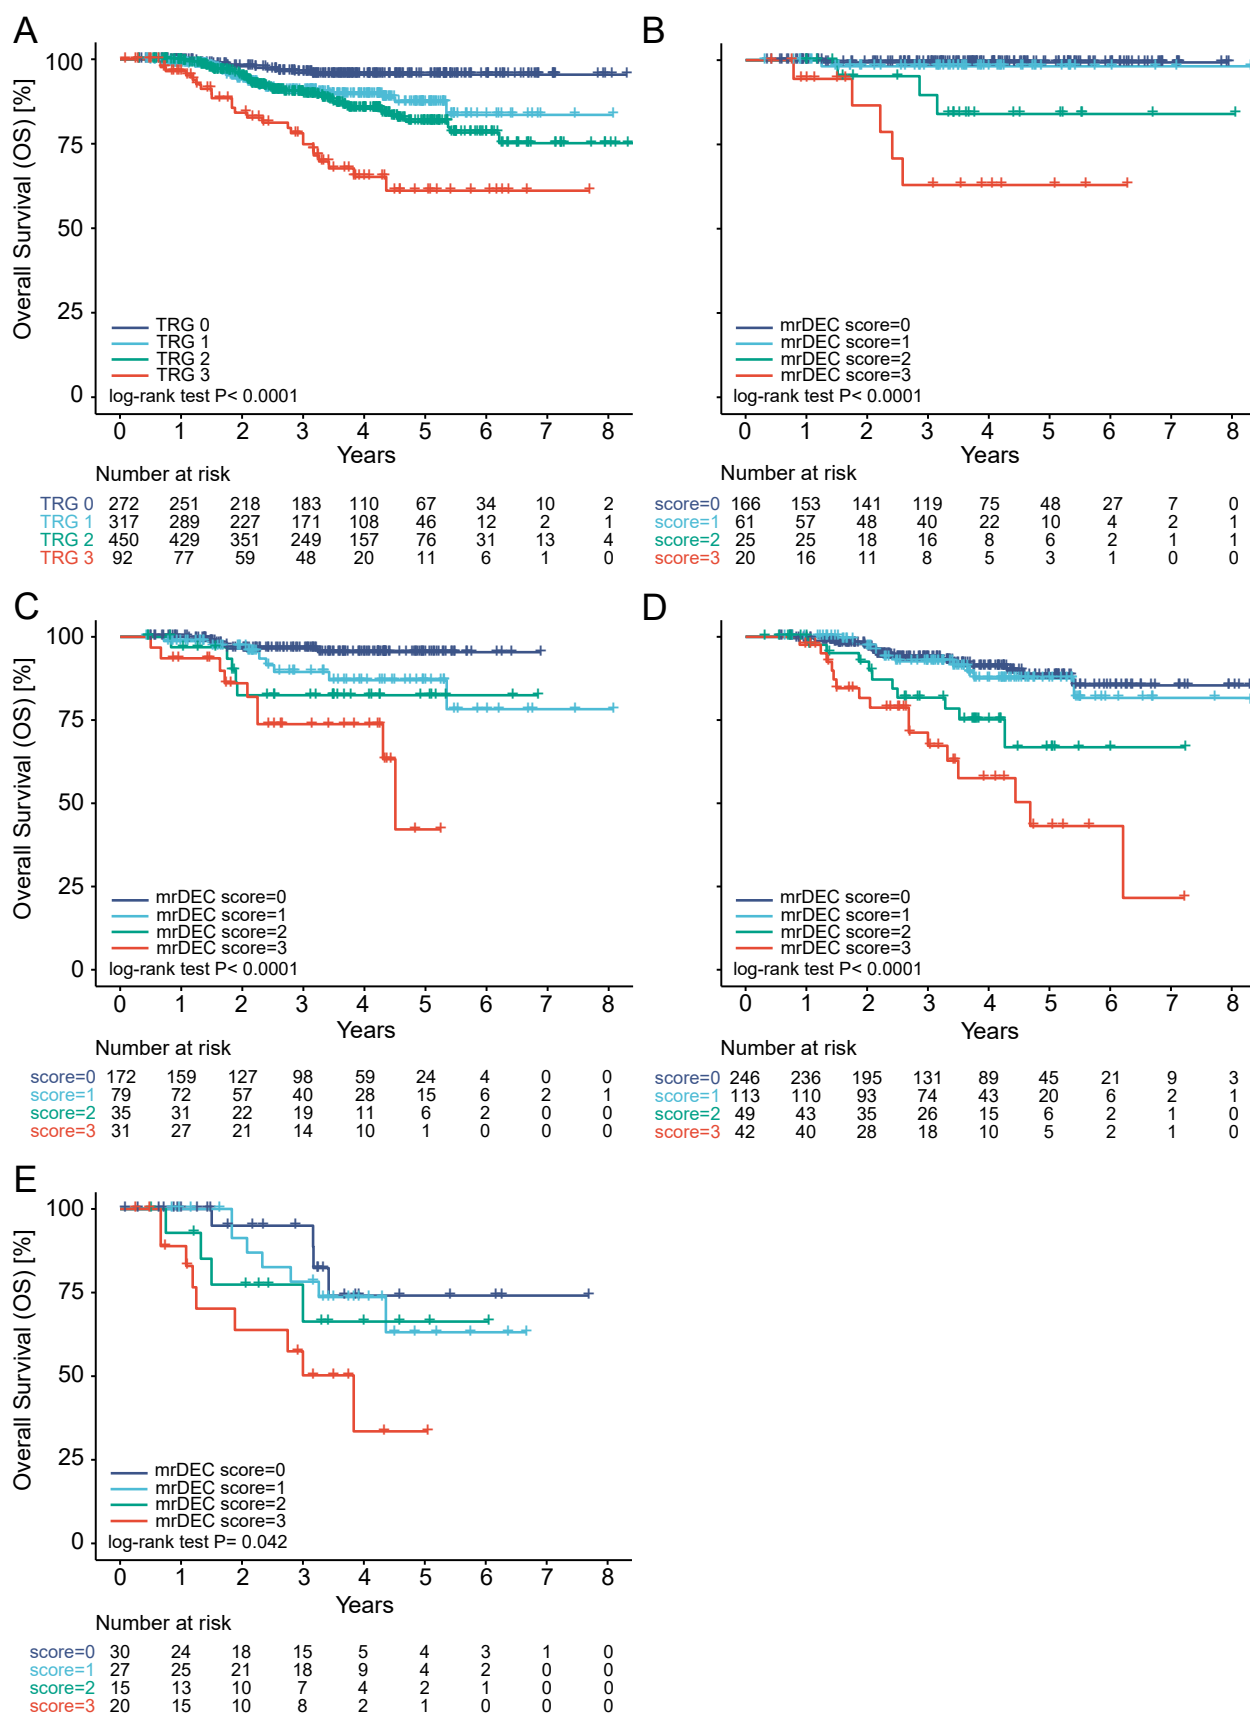

**Figure S4. Kaplan-Meier curves for overall survival (OS) according to TRG and mrDEC score.** (A) Kaplan-Meier survival curves for overall survival according to TRG. Kaplan-Meier survival curves for overall survival in patients with (B) TRG 0, (C) TRG 1, (D) TRG 2, and (E) TRG 3 according to mrDEC score. TRG, tumor regression grade.



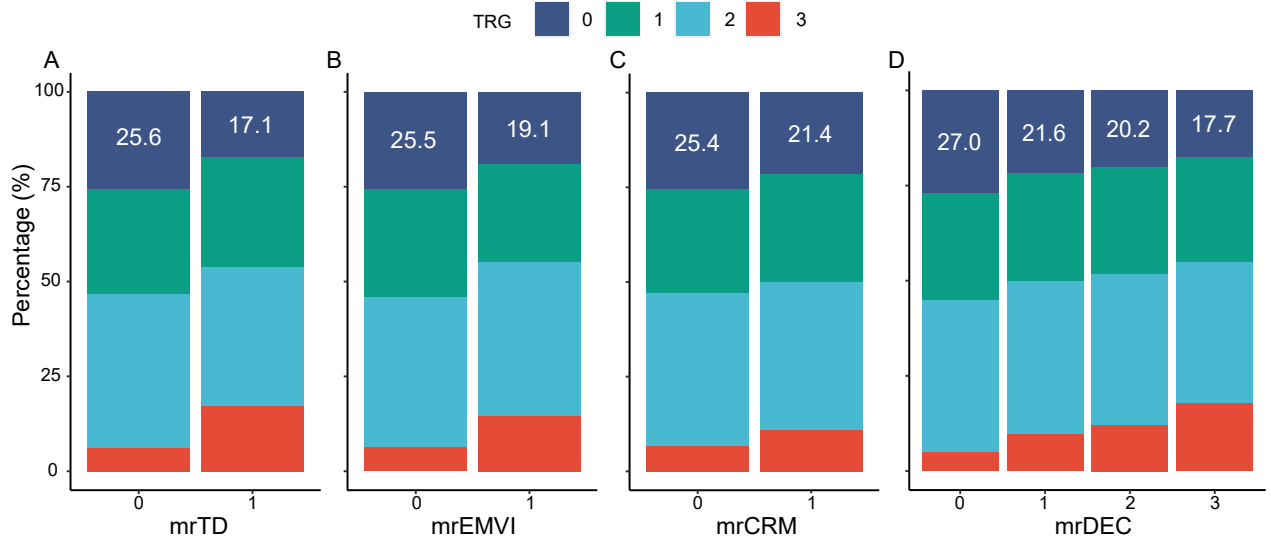

**Figure S5. Stacked bar chart of tumor regression grade in Cohort 1.** Efficacy analysis of neoadjuvant therapy according to (A) mrTD status, (B) mrEMVI status, (C) mrCRM status, and (D) mrDEC score. TD, tumor deposit; EMVI, extramural vascular invasion; CRM, circumferential resection margin; TRG, tumor regression grade.

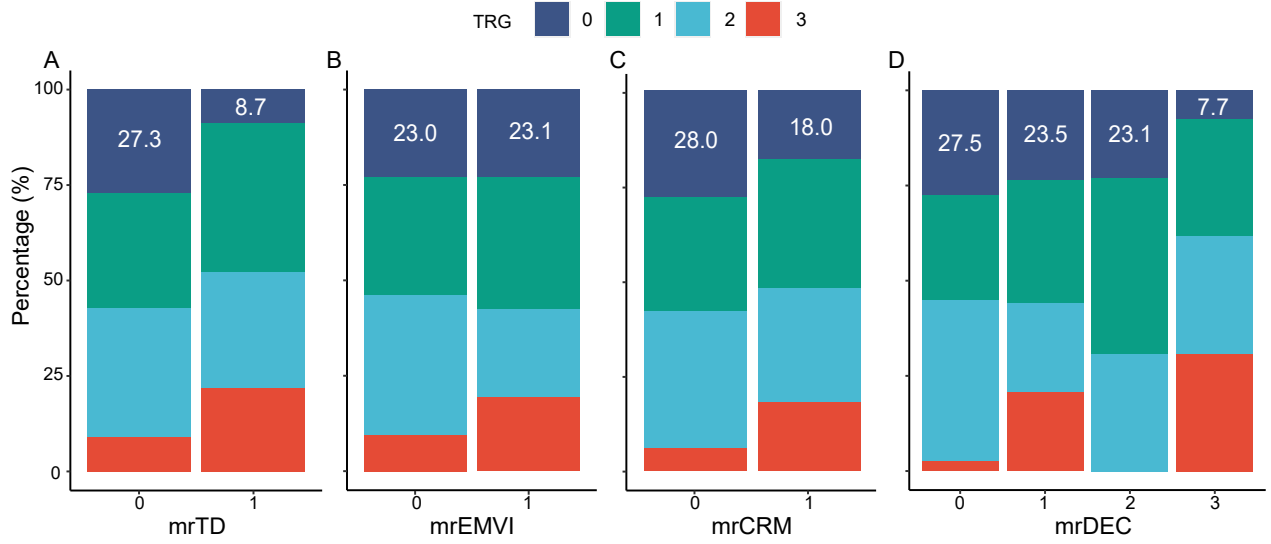

**Figure S6. Stacked bar chart of tumor regression grade in Cohort 2.** Efficacy analysis of neoadjuvant therapy according to (A) mrTD status, (B) mrEMVI status, (C) mrCRM status, and (D) mrDEC score. TD, tumor deposit; EMVI, extramural vascular invasion; CRM, circumferential resection margin; TRG, tumor regression grade.

**Table S1.** The MRI image acquisition parameters of the multiple centers

| Hospital                                                       | Scanner                   | Patients<br>No.     | Sequence             | TR/TE <sup>a</sup><br>(ms) | FOV<br>(mm) | Matrix  | Slice Thickness<br>(mm) | Slice Gap<br>(mm) | Slices | Flip Angle |
|----------------------------------------------------------------|---------------------------|---------------------|----------------------|----------------------------|-------------|---------|-------------------------|-------------------|--------|------------|
| Guangdong<br>Provincial People's<br>Hospital                   | Philips 3.0T<br>(Ingenia) | 54                  | T2WI <sup>b</sup>    | 4300/141.12                | 100         | 464×461 | 4                       | 5.1               | 24     | 90°        |
|                                                                |                           |                     | DWI <sup>b</sup>     | 922.18/65.658              | 74          | 108×105 | 6                       | 7                 | 36     | 90°        |
|                                                                |                           |                     | CE-T1WI <sup>b</sup> | 4/1                        | 121         | 280×278 | 4                       | 2                 | 80     | 10°        |
| The Sixth Affiliated<br>Hospital of Sun Yat-<br>sen University | GE 3.0T<br>(OPTIMA)       | 300+43 <sup>c</sup> | T2WI                 | 4300/104                   | 100         | 288×256 | 3                       | 6                 | 26     | 90°        |
|                                                                |                           |                     | DWI                  | 4500/92                    | 100         | 192×192 | 3                       | 6                 | 20     | 90°        |
|                                                                |                           |                     | CE-T1WI              | 6/3                        | 90          | 288×256 | 2                       | 5                 | 44     | 12°        |
| Sun Yat-sen<br>University Cancer<br>Center                     | Philips 3.0T<br>(Achieva) | 45                  | T2WI                 | 2852/90                    | 100         | 516×510 | 5                       | 6                 | 32     | 90°        |
|                                                                |                           |                     | DWI                  | 2374/51                    | 70          | 132×127 | 5                       | 5.5               | 36     | 90°        |
|                                                                |                           |                     | CE-T1WI              | 6/3                        | 90          | 288×285 | 6                       | 7                 | 40     | 10°        |
|                                                                | GE 3.0T<br>(DISCOVERY)    | 105                 | T2WI                 | 6480-728/81.692            | 100         | 382×384 | 5                       | 6                 | 36     | 90°        |
|                                                                |                           |                     | DWI                  | 4000/56.7                  | 80          | 128×128 | 5                       | 6                 | 24     | 90°        |
|                                                                |                           |                     | CE-T1WI              | 4/2                        | 80          | 320×140 | 3                       | 5                 | 40     | 10°        |
|                                                                | GE 1.5T<br>(SIGNA)        | 90                  | T2WI                 | 6000/92.184                | 60          | 320×224 | 5                       | 10                | 24     | 90°        |
|                                                                |                           |                     | DWI                  | 5000/75.6                  | 100         | 128×128 | 6                       | 7                 | 25     | 90°        |
|                                                                |                           |                     | CE-T1WI              | 4/2                        | 83          | 288×256 | 2                       | 5                 | 41     | 11°        |
| SIEMENS 3.0T<br>(Trio Tim)                                     | 237                       | T2WI                | 3000/84              | 75                         | 384×230     | 5       | 6                       | 30                | 90°    |            |
|                                                                |                           | DWI                 | 4000/70              | 50                         | 128×64      | 5       | 6                       | 24                | 90°    |            |
|                                                                |                           | CE-T1WI             | 5/2                  | 82                         | 288×211     | 2       | 4                       | 44                | 9°     |            |
| Shanxi Cancer<br>Hospital                                      | Philips 3.0T<br>(Achieva) | 185                 | T2WI                 | 3000/80                    | 100         | 300×223 | 3                       | 3.3               | 20     | 90°        |
|                                                                |                           |                     | DWI                  | 2750/53                    | 80          | 124×187 | 5                       | 5.5               | 32     | 90°        |
|                                                                |                           |                     | CE-T1WI <sup>d</sup> | 623.638/20                 | 115         | 408×367 | 6                       | 7.5               | 32     | 90°        |
| Yunnan Cancer<br>Hospital                                      | SIEMENS 1.5T<br>(Avanto)  | 80                  | T2WI                 | 3200/100                   | 100         | 288×320 | 4                       | 4                 | 20     | 90°        |
|                                                                |                           |                     | DWI                  | 4900/84                    | 80          | 220×220 | 4                       | 6                 | 24     | 90°        |
|                                                                |                           |                     | CE-T1WI              | 5/2                        | 75          | 320×163 | 6                       | 3                 | 39     | 10°        |

|                                                                 |                           |       |         |          |     |         |   |   |    |     |
|-----------------------------------------------------------------|---------------------------|-------|---------|----------|-----|---------|---|---|----|-----|
|                                                                 | Philips 3.0T<br>(Ingenia) | 70+31 | T2WI    | 2100/100 | 100 | 400×284 | 4 | 4 | 18 | 90° |
|                                                                 |                           |       | DWI     | 3070/62  | 100 | 108×129 | 3 | 6 | 40 | 90° |
|                                                                 |                           |       | CE-T1WI | 3/1      | 90  | 268×250 | 5 | 5 | 40 | 10° |
| <b>Sir Run Run Shaw<br/>Hospital of Zhejiang<br/>University</b> | GE 3.0T<br>(SIGNA)        | +18   | T2WI    | 3200/132 | 100 | 320×224 | 5 | 6 | 30 | 90° |
|                                                                 |                           |       | DWI     | 5900/66  | 80  | 96×130  | 5 | 6 | 30 | 90° |
|                                                                 |                           |       | CE-T1WI | 4/2      | 90  | 320×256 | 4 | 2 | 72 | 12° |
| <b>Nanfang Hospital of<br/>Southern Medical<br/>University</b>  | Philips 3.0T              | +8    | T2WI    | 4000/100 | 100 | 316×314 | 3 | 3 | 28 | 90° |
|                                                                 |                           |       | DWI     | 2000/60  | 100 | 120×118 | 4 | 4 | 28 | 90° |
|                                                                 |                           |       | CE-T1WI | 6/3      | 100 | 227×228 | 6 | 4 | 24 | 10° |

Note: Data were *n* or metric value. <sup>a</sup>TR, repetition time; TE, echo time; FOV, field of view. <sup>b</sup>T2WI, T2 weighted imaging; DWI, diffusion weighted imaging; CE-T1WI, contrast enhanced-T1 weighted imaging. <sup>c+</sup> num, indicated the case number in the prospective cohort. <sup>d</sup>STIR sequences.

**Table S2.** Evaluation criterion of MRI markers in rectal cancer

| Imaging features |          | Definition and imaging findings                                                                                                                                  |                                                                                     |
|------------------|----------|------------------------------------------------------------------------------------------------------------------------------------------------------------------|-------------------------------------------------------------------------------------|
| mrT stage        | T1 or T2 | Intact hypointense line surrounding the rectum on MRI                                                                                                            |                                                                                     |
|                  | T3       | Interruption of the hypointense muscularis propria with specular or nodular extension of tumor signal beyond the rectal wall into the mesorectal fat.            |                                                                                     |
|                  | T4a      | Invade the peritoneum or peritoneal reflection                                                                                                                   |                                                                                     |
|                  | T4b      | Invade other organs or structures outside the mesorectum                                                                                                         |                                                                                     |
| mrN stage        | N0       | No suspicious lymph nodes                                                                                                                                        | Suspicious if > 9mm                                                                 |
|                  | N1       | 1-3 suspicious lymph nodes / no suspicious lymph nodes but tumor deposits                                                                                        | 5-9mm, and 2 malignant characteristics<br>< 5mm, and 3 malignant characteristics    |
|                  | N2       | ≥ 3 suspicious lymph nodes                                                                                                                                       | Malignant characteristics: indistinct border, heterogeneous signal, and round shape |
| mrEMVI           | Positive | Tumor signal extending within vessel                                                                                                                             |                                                                                     |
|                  | Negative | No involved vessels in vicinity of tumor                                                                                                                         |                                                                                     |
| Involved mrCRM   |          | Tumor directly invades the CRM or the margin between the tumor and CRM is ≤ 1 mm (including extramural venous invasion, tumor deposits or irregular lymph nodes) |                                                                                     |
| mrTD             |          | Irregular nodules within the mesorectum that directly interrupt the course of veins but are discontinuous from the primary tumor.                                |                                                                                     |

Abbreviations: MRI, Magnetic Resonance Imaging; TD, tumor deposit; EMVI, extramural vascular invasion; CRM, circumferential resection margin.

**Table S3.** Descriptive analysis of tumor characteristics in Cohort 1 stratified by MRI markers

|                   | mrTD<br>negative | mrTD<br>positive | <i>P</i> | mrEMVI<br>negative | mrEMVI<br>positive | <i>P</i> | mrCRM<br>clear | mrCRM<br>involved | <i>P</i> |
|-------------------|------------------|------------------|----------|--------------------|--------------------|----------|----------------|-------------------|----------|
| <b>Age, years</b> |                  |                  | 0.152    |                    |                    | 0.116    |                |                   | 0.001    |
| Mean±SD           | 54.8±11.1        | 53.6±12.3        |          | 54.9±11.2          | 53.7±1.7           |          | 55.4±10.8      | 53.2±12.1         |          |
| <b>Sex</b>        |                  |                  | 0.165    |                    |                    | 0.207    |                |                   | 0.968    |
| Male              | 647 (67.5)       | 143 (62.4)       |          | 587 (65.5)         | 203 (69.8)         |          | 505 (66.4)     | 285 (66.7)        |          |
| Female            | 311 (32.5)       | 86 (37.6)        |          | 309 (34.5)         | 88 (30.2)          |          | 255 (33.6)     | 142 (33.3)        |          |
| <b>CEA level</b>  |                  |                  | 0.008    |                    |                    | 0.127    |                |                   | 0.550    |
| Normal            | 580 (60.5)       | 116 (50.7)       |          | 537 (59.9)         | 159 (54.6)         |          | 451 (59.3)     | 245 (57.4)        |          |
| Abnormal          | 378 (39.5)       | 113 (49.3)       |          | 359 (40.1)         | 132 (45.4)         |          | 309 (40.7)     | 182 (42.6)        |          |
| <b>Location</b>   |                  |                  | 0.001    |                    |                    | 0.018    |                |                   | <0.001   |
| Low               | 481 (50.2)       | 88 (38.4)        |          | 448 (50.0)         | 121 (41.6)         |          | 391 (51.4)     | 178 (41.7)        |          |
| Middle            | 434 (45.3)       | 120 (52.4)       |          | 406 (45.3)         | 148 (50.9)         |          | 345 (45.4)     | 209 (48.9)        |          |
| High              | 43 (4.5)         | 21 (9.2)         |          | 42 (4.7)           | 22 (7.6)           |          | 24 (3.2)       | 40 (9.4)          |          |
| <b>cTNM stage</b> |                  |                  | <0.001   |                    |                    | <0.001   |                |                   | <0.001   |
| II                | 182 (19.0)       | 11 (4.8)         |          | 178 (19.9)         | 15 (5.2)           |          | 154 (20.3)     | 39 (9.1)          |          |
| III               | 776 (81.0)       | 218 (95.2)       |          | 718 (80.1)         | 276 (94.8)         |          | 606 (79.7)     | 388 (90.9)        |          |
| <b>mrT stage</b>  |                  |                  | <0.001   |                    |                    | <0.001   |                |                   | <0.001   |
| T1-T2             | 10 (1.0)         | 0 (0.0)          |          | 10 (1.1)           | 0 (0.0)            |          | 10 (1.3)       | 0 (0.0)           |          |
| T3                | 820 (85.6)       | 157 (68.6)       |          | 771 (86.0)         | 206 (70.8)         |          | 731 (96.2)     | 246 (57.6)        |          |
| T4                | 128 (13.4)       | 72 (31.4)        |          | 115 (12.8)         | 85 (29.2)          |          | 19 (2.5)       | 181 (42.4)        |          |
| <b>mrN stage</b>  |                  |                  | <0.001   |                    |                    | <0.001   |                |                   | <0.001   |
| N0                | 343 (35.8)       | 5 (2.2)          |          | 328 (36.6)         | 20 (6.9)           |          | 290 (38.2)     | 58 (13.6)         |          |
| N1                | 352 (36.7)       | 88 (38.4)        |          | 333 (37.2)         | 107 (36.8)         |          | 297 (39.1)     | 143 (33.5)        |          |
| N2                | 263 (27.5)       | 136 (59.4)       |          | 235 (26.2)         | 164 (56.4)         |          | 173 (22.8)     | 226 (52.9)        |          |

Unless otherwise indicated, data are number of patients and data in parentheses are percentages.

Abbreviation: mr, magnetic resonance; CEA, carcinoembryonic antigen; TNM, tumor-node-metastasis; TD, tumor deposit; EMVI, extramural vascular invasion; CRM, circumferential resection margin.

**Table S4.** Descriptive analysis of tumor characteristics in Cohort 2 stratified by MRI markers

|                   | mrTD<br>negative | mrTD<br>positive | <i>P</i> | mrEMVI<br>negative | mrEMVI<br>positive | <i>P</i> | mrCRM<br>clear | mrCRM<br>involved | <i>P</i> |
|-------------------|------------------|------------------|----------|--------------------|--------------------|----------|----------------|-------------------|----------|
| <b>Age, years</b> |                  |                  | 0.532    |                    |                    | 0.534    |                |                   | 0.089    |
| Mean±SD           | 56.9±12.3        | 58.7±11.4        |          | 57.8±11.8          | 56.0±12.9          |          | 59.4±10.1      | 55.3±13.5         |          |
| <b>Sex</b>        |                  |                  | 0.570    |                    |                    | 0.693    |                |                   | 1.000    |
| Male              | 57 (74.0)        | 19 (82.6)        |          | 55 (74.3)          | 21 (80.8)          |          | 38 (76.0)      | 38 (76.0)         |          |
| Female            | 20 (26.0)        | 4 (17.4)         |          | 19 (25.7)          | 5 (19.2)           |          | 12 (24.0)      | 12 (24.0)         |          |
| <b>cTNM stage</b> |                  |                  | NA       |                    |                    | NA       |                |                   | NA       |
| II                | 0 (0.0)          | 0 (0.0)          |          | 0 (0.0)            | 0 (0.0)            |          | 0 (0.0)        | 0 (0.0)           |          |
| III               | 77 (100)         | 23 (100)         |          | 74 (100)           | 26 (100)           |          | 50 (100)       | 50 (100)          |          |
| <b>mrT stage</b>  |                  |                  |          |                    |                    | 0.254    |                |                   | <0.001   |
| T1-T3             | 61 (79.2)        | 18 (78.3)        | 1.000    | 61 (82.4)          | 18 (69.2)          |          | 50 (100)       | 29 (58.0)         |          |
| T4                | 16 (20.8)        | 5 (21.7)         |          | 13 (17.6)          | 8 (30.8)           |          | 0 (0.0)        | 21 (42.0)         |          |
| <b>mrN stage</b>  |                  |                  | 0.002    |                    |                    | 0.013    |                |                   | 0.061    |
| N0                | 23 (29.9)        | 0 (0.0)          |          | 21 (28.4)          | 2 (7.7)            |          | 16 (32.0)      | 7 (14.0)          |          |
| N1                | 30 (39.0)        | 8 (34.8)         |          | 30 (40.5)          | 8 (30.8)           |          | 19 (38.0)      | 19 (38.0)         |          |
| N2                | 24 (31.2)        | 15 (65.2)        |          | 23 (31.1)          | 16 (61.5)          |          | 15 (30.0)      | 24 (48.0)         |          |

Unless otherwise indicated, data are number of patients and data in parentheses are percentages.

Abbreviation: TNM, tumor-node-metastasis; TD, tumor deposit; EMVI, extramural vascular invasion; CRM, circumferential resection margin.

**Table S5.** Descriptive analysis of tumor characteristics in Cohort 1 stratified by mrDEC score

|                   | mrDEC<br>score=0 | mrDEC<br>score=1 | mrDEC<br>score=2 | mrDEC<br>score=3 | <i>P</i> |
|-------------------|------------------|------------------|------------------|------------------|----------|
| <b>Age, years</b> |                  |                  |                  |                  | 0.025    |
| Mean±SD           | 55.5±10.7        | 53.7±11.8        | 54.1±11.7        | 52.8±12.3        |          |
| <b>Sex</b>        |                  |                  |                  |                  | 0.434    |
| Male              | 419 (66.1)       | 192 (66.7)       | 98 (72.1)        | 81 (62.8)        |          |
| Female            | 215 (33.9)       | 96 (33.3)        | 38 (27.9)        | 48 (37.2)        |          |
| <b>CEA level</b>  |                  |                  |                  |                  | 0.161    |
| Normal            | 386 (60.9)       | 165 (57.3)       | 80 (58.8)        | 65 (50.4)        |          |
| Abnormal          | 248 (39.1)       | 123 (42.7)       | 56 (41.2)        | 64 (49.6)        |          |
| <b>Location</b>   |                  |                  |                  |                  | <0.001   |
| Low               | 330 (52.1)       | 134 (46.5)       | 62 (45.6)        | 43 (33.3)        |          |
| Middle            | 283 (44.6)       | 134 (46.5)       | 68 (50.0)        | 69 (53.5)        |          |
| High              | 21 (3.3)         | 20 (6.9)         | 6 (4.4)          | 17 (13.2)        |          |
| <b>cTNM stage</b> |                  |                  |                  |                  | <0.001   |
| II                | 145 (22.9)       | 38 (13.2)        | 3 (2.2)          | 7 (5.4)          |          |
| III               | 489 (77.1)       | 250 (86.8)       | 133 (97.8)       | 122 (94.6)       |          |
| <b>mrT stage</b>  |                  |                  |                  |                  | <0.001   |
| T1-T2             | 10 (1.6)         | 0 (0.0)          | 0 (0.0)          | 0 (0.0)          |          |
| T3                | 608 (95.9)       | 194 (67.4)       | 110 (80.9)       | 65 (50.4)        |          |
| T4                | 16 (2.5)         | 94 (32.6)        | 26 (19.1)        | 64 (49.6)        |          |
| <b>mrN stage</b>  |                  |                  |                  |                  | <0.001   |
| N0                | 279 (44.0)       | 57 (19.8)        | 10 (7.4)         | 2 (1.6)          |          |
| N1                | 234 (36.9)       | 116 (40.3)       | 48 (35.3)        | 42 (32.6)        |          |
| N2                | 121 (19.1)       | 115 (39.9)       | 78 (57.4)        | 85 (65.9)        |          |

Unless otherwise indicated, data are number of patients and data in parentheses are percentages.

Abbreviation: mr, magnetic resonance; CEA, carcinoembryonic antigen; TNM, tumor-node-metastasis; TD, tumor deposit; EMVI, extramural vascular invasion; CRM, circumferential resection margin.



**Table S6.** Descriptive analysis of tumor characteristics in Cohort 2 stratified by mrDEC score

|                   | <b>mrDEC<br/>score=0</b> | <b>mrDEC<br/>score=1</b> | <b>mrDEC<br/>score=2</b> | <b>mrDEC<br/>score=3</b> | <b><i>P</i></b> |
|-------------------|--------------------------|--------------------------|--------------------------|--------------------------|-----------------|
| <b>Age, years</b> |                          |                          |                          |                          | 0.796           |
| Mean±SD           | 58.8±9.8                 | 56.6±13.7                | 55.5±15.3                | 56.5±11.0                |                 |
| <b>Sex</b>        |                          |                          |                          |                          | 0.492           |
| Male              | 31 (77.5)                | 23 (67.6)                | 11 (84.6)                | 11 (84.6)                |                 |
| Female            | 9 (22.5)                 | 11 (32.4)                | 2 (15.4)                 | 2 (15.4)                 |                 |
| <b>cTNM stage</b> |                          |                          |                          |                          | NA              |
| II                | 0 (0.0)                  | 0 (0.0)                  | 0 (0.0)                  | 0 (0.0)                  |                 |
| III               | 40 (100)                 | 34 (100)                 | 13 (100)                 | 13 (100)                 |                 |
| <b>mrT stage</b>  |                          |                          |                          |                          | <0.001          |
| T1-T3             | 40 (100.0)               | 21 (61.8)                | 10 (76.9)                | 8 (61.5)                 |                 |
| T4                | 0 (0.0)                  | 13 (38.2)                | 3 (23.1)                 | 5 (38.5)                 |                 |
| <b>mrN stage</b>  |                          |                          |                          |                          | 0.004           |
| N0                | 16 (40.0)                | 5 (14.7)                 | 2 (15.4)                 | 0 (0.0)                  |                 |
| N1                | 15 (37.5)                | 16 (47.1)                | 2 (15.4)                 | 5 (38.5)                 |                 |
| N2                | 9 (22.5)                 | 13 (38.2)                | 9 (69.2)                 | 8 (61.5)                 |                 |

Unless otherwise indicated, data are number of patients and data in parentheses are percentages.

Abbreviation: TNM, tumor-node-metastasis; TD, tumor deposit; EMVI, extramural vascular invasion; CRM, circumferential resection margin.

**Table S7.** Inter-reader agreement for the assessment of MRI marker status and mrDEC score in 60 patients

|                                          | Cohen's kappa <sup>a</sup> |        |       |       |
|------------------------------------------|----------------------------|--------|-------|-------|
|                                          | mrTD <sup>b</sup>          | mrEMVI | mrCRM | mrDEC |
| <b>Senior radiologists (R5/R6)</b>       | 0.773                      | 0.651  | 0.720 | 0.774 |
| <b>Intermediate radiologists (R3/R4)</b> | 0.773                      | 0.408  | 0.481 | 0.815 |
| <b>Junior radiologists (R1/R2)</b>       | 0.721                      | 0.444  | 0.444 | 0.692 |

<sup>a</sup>Linear weighted kappa tests were used except for mrDEC which used squared weighted kappa tests.

<sup>b</sup>All MRI markers (mrTD, mrEMVI, and mrCRM) were assessed for status only, not for staging.

Kappa value: 0.81-1.00, excellent agreement; 0.61-0.80, substantial agreement; 0.41-0.60, moderate agreement; 0.21-0.40, fair agreement; 0-0.20, poor or no agreement.

Abbreviation: R, reader; TD, tumor deposit; EMVI, extramural vascular invasion; CRM, circumferential resection margin.

**Table S8.** Concordance index of markers for DFS and OS predictions in Cohort 1

|                      | Disease-free survival |           | Overall survival |           |
|----------------------|-----------------------|-----------|------------------|-----------|
|                      | C-index               | 95 CI     | C-index          | 95 CI     |
| <b>CEA level</b>     | 0.55                  | 0.52–0.58 | 0.56             | 0.51–0.61 |
| <b>Location</b>      | 0.53                  | 0.50–0.57 | 0.54             | 0.50–0.59 |
| <b>cTNM stage</b>    | 0.52                  | 0.50–0.54 | 0.50             | 0.47–0.54 |
| <b>mrT stage</b>     | 0.55                  | 0.52–0.58 | 0.57             | 0.53–0.66 |
| <b>mrN stage</b>     | 0.55                  | 0.52–0.59 | 0.56             | 0.52–0.61 |
| <b>mrTD status</b>   | 0.67                  | 0.64–0.70 | 0.69             | 0.65–0.74 |
| <b>mrEMVI status</b> | 0.62                  | 0.59–0.65 | 0.63             | 0.59–0.68 |
| <b>mrCRM status</b>  | 0.60                  | 0.57–0.64 | 0.64             | 0.59–0.68 |
| <b>mrDEC status</b>  | 0.69                  | 0.66–0.73 | 0.72             | 0.69–0.75 |

Abbreviations: C-index, Concordance index; TD, tumor deposit; EMVI, extramural vascular invasion; CRM, circumferential resection margin.
